# Supplementary material for: Regulation of Indoleamine-3,5-dioxygenase 1 (IDO1) in Lung Epithelial Cells by Coronaviruses (SARS-CoV) and Cytokine Signaling
Source: Research Square preprint supplement (doi:10.21203/rs.3.rs-871230/v1), 2021-09-07

**SUPPLEMENTARY DATA**

**IDO1  
indoleamine  
2,3dioxygenase**

| <b>Species</b> | <b>Tissue</b> | <b>Probe</b> | <b>Symbol</b> | <b>Fold<br/>Change</b> | <b>P-value</b> | <b>TREATMENT</b> |
|----------------|---------------|--------------|---------------|------------------------|----------------|------------------|
| Human          | epidermis     | 210029       | IDO1          | 23.071576              | 4.3E-09        | IFNG             |
| Human          | K562 cells    | 9606         | IDO1          | 22.064875              | 1E-10          | IFNG             |
| Human          | hepatocytes   | 210029       | IDO1          | 5.0576359              | 1.6E-09        | IFNA1            |
| Human          | hepatocytes   | 210029       | IDO1          | 3.2176583              | 1.2E-07        | IFNA1            |
| Human          | MCF-7 cells   | 210029       | IDO1          | 4.3180883              | 3.47E-05       | EGF              |
| Human          | MCF-7 cells   | 210029       | IDO1          | 4.3180883              | 3.47E-05       | EGF              |
| Mouse          | hepatocytes   | 1420437      | Ido1          | 2.3394624              | 6.73E-05       | HGF,IL6          |
| Mouse          | hepatocytes   | 1420437      | Ido1          | 2.1341035              | 0.006333       | HGF,IL6          |
| Mouse          | hepatocytes   | 1420437      | Ido1          | 2.0555055              | 4.84E-05       | HGF,IL6          |
| Mouse          | hepatocytes   | 1420437      | Ido1          | 2.0226095              | 5.14E-05       | IL6              |
| Human          | K562 cells    | 9606         | IDO1          | 26.026256              | 0              | P3CSK4           |
| Human          | K562 cells    | 9606         | IDO1          | 12.110455              | 2.26E-08       | P3CSK4           |
| House          | ventricle     | 1420437      | Ido1          | 3.3403517              | 0.0083         | LPS              |
| Mouse          | ventricle     | 1420437      | Ido1          | 2.9236082              | 0.00021        | LPS              |
| Rat            | whole liver   | 1387608      | Ido1          | 2.4988271              | 2.3E-06        | LPS              |
| Mouse          | BMDM          | 1223600      | Ido1          | 2.608087               | 3.87E-05       | LPS              |
| Rat            | whole liver   | 1387608      | Ido1          | 2.0440363              | 9.64E-05       | LPS              |
| Human          | A549 cells    | 8146092      | IDO1          | 2.3084002              | 0.000084       | TNF              |
| Human          | A549 cells    | 1656310      | IDO1          | -2.109141              | 0.003283       | DEX              |
| Human          | A549 cells    | 3239965      | IDO1          | -2.0848231             | 0.004684       | DEX              |
| Mouse          | BMDM          | 1223600      | Ido1          | -2.1970779             | 0.00015        | DEX              |
| Human          | DC            | 210029       | IDO1          | -6.2300403             | 0.002378       | ROSI             |
| Mouse          | AORTA         | 97731        | Ido1          | -6.0737384             | 0.009382       | ROSI             |
| Human          | fibroblast    | 210029t      | IDO1          | -2.604244              | 0.04695        | TGFB2            |

## INTERFEROME

### Gene Symbol IDO1 (indoleamine 2,3-dioxygenase 1)

| DATA ID | Fold CHANGE | IFN Type | Treat Time (HR) | Gene Symbol | Gene Name                                    |
|---------|-------------|----------|-----------------|-------------|----------------------------------------------|
| 126     | 1036.901    | II       | 24.0            | IDO1        | indoleamine 2,3-dioxygenase 1 [Source:HGNC   |
| 127     | 15.107131   | II       | 24.0            | IDO1        | indoleamine 2,3-dioxygenase 1 [Source:HGNC   |
| 146     | 66.24625    | II       | 4.0             | IDO1        | indoleamine 2,3-dioxygenase 1 [Source:HGNC   |
| 149     | 4.8048797   | I        | 24.0            | IDO1        | indoleamine 2,3-dioxygenase 1 [Source:HGNC   |
| 173     | 279.4501    | II       | 20.0            | IDO1        | indoleamine 2,3-dioxygenase 1 [Source:HGNC   |
| 174     | 254.95198   | II       | 20.0            | IDO1        | indoleamine 2,3-dioxygenase 1 [Source:HGNC   |
| 192     | 2.91195     | I        | 6.0             | IDO1        | indoleamine 2,3-dioxygenase 1 [Source:HGNC   |
| 226     | 5.1313167   | I        | 6.0             | IDO1        | indoleamine 2,3-dioxygenase 1 [Source:HGNC   |
| 227     | 4.514594    | I        | 12.0            | IDO1        | indoleamine 2,3-dioxygenase 1 [Source:HGNC   |
| 228     | 2.0905187   | I        | 18.0            | IDO1        | indoleamine 2,3-dioxygenase 1 [Source:HGNC   |
| 318     | 236.42982   | II       | 6.0             | IDO1        | indoleamine 2,3-dioxygenase 1 [Source:HGNC   |
| 319     | 768.541     | II       | 18.0            | IDO1        | indoleamine 2,3-dioxygenase 1 [Source:HGNC   |
| 12      | 125.07597   | II       | 24.0            | IDO1        | indoleamine 2,3-dioxygenase 1 [Source:HGNC   |
| 13      | 16.546137   | II       | 6.0             | IDO1        | indoleamine 2,3-dioxygenase 1 [Source:HGNC   |
| 37      | 28.160145   | II       | 5.0             | IDO1        | indoleamine 2,3-dioxygenase 1 [Source:HGNC   |
| 39      | 407.93698   | II       | 5.0             | IDO1        | indoleamine 2,3-dioxygenase 1 [Source:HGNC   |
| 40      | 96.44835    | I        | 5.0             | IDO1        | indoleamine 2,3-dioxygenase 1 [Source:HGNC   |
| 41      | 82.274704   | I        | 5.0             | IDO1        | indoleamine 2,3-dioxygenase 1 [Source:HGNC   |
| 61      | 11.624224   | I        | 72.0            | IDO1        | indoleamine 2,3-dioxygenase 1 [Source:HGNC   |
| 63      | 112.01323   | II       | 6.0             | IDO1        | indoleamine 2,3-dioxygenase 1 [Source:HGNC   |
| 64      | 203.9916    | II       | 24.0            | IDO1        | indoleamine 2,3-dioxygenase 1 [Source:HGNC   |
| 144     | 126.76817   | II       | 24.0            | IDO1        | indoleamine 2,3-dioxygenase 1 [Source:HGNC   |
| 182     | 130.28447   | II       | 8.0             | IDO1        | indoleamine 2,3-dioxygenase 1 [Source:HGNC   |
| 183     | 191.92735   | II       | 24.0            | IDO1        | indoleamine 2,3-dioxygenase 1 [Source:HGNC   |
| 184     | 81.825485   | II       | 24.0            | IDO1        | indoleamine 2,3-dioxygenase 1 [Source:HGNC   |
| 295     | 18.390663   | II       | 24.0            | IDO1        | indoleamine 2,3-dioxygenase 1 [Source:HGNC   |
| 311     | 315.15765   | II       | 24.0            | IDO1        | indoleamine 2,3-dioxygenase 1 [Source:HGNC   |
| 313     | 107.53709   | II       | 72.0            | IDO1        | indoleamine 2,3-dioxygenase 1 [Source:HGNC   |
| 58      | 34.031605   | I        | 3.0             | IDO1        | indoleamine 2,3-dioxygenase 1 [Source:HGNC   |
| 74      | 4.03055     | I        | 16.0            | IDO1        | indoleamine 2,3-dioxygenase 1 [Source:HGNC S |
| 82      | 12.1536     | II       | 12.0            | IDO1        | indoleamine 2,3-dioxygenase 1 [Source:HGNC   |
| 83      | 33.6245     | II       | 24.0            | IDO1        | indoleamine 2,3-dioxygenase 1 [Source:HGNC   |
| 85      | 13.8904     | II       | 48.0            | IDO1        | indoleamine 2,3-dioxygenase 1 [Source:HGNC   |

|     |            |    |       |      |                                            |
|-----|------------|----|-------|------|--------------------------------------------|
| 123 | 7.7116632  | II | 168.0 | IDO1 | indoleamine 2,3-dioxygenase 1 [Source:HGNC |
| 124 | 19.148584  | II | 168.0 | IDO1 | indoleamine 2,3-dioxygenase 1 [Source:HGNC |
| 128 | 655.7897   | II | 10.0  | IDO1 | indoleamine 2,3-dioxygenase 1 [Source:HGNC |
| 129 | 59.959095  | I  | 10.0  | IDO1 | indoleamine 2,3-dioxygenase 1 [Source:HGNC |
| 130 | 40.86935   | I  | 10.0  | IDO1 | indoleamine 2,3-dioxygenase 1 [Source:HGNC |
| 131 | 529.04755  | II | 10.0  | IDO1 | indoleamine 2,3-dioxygenase 1 [Source:HGNC |
| 160 | 5.1172132  | I  | 18.0  | IDO1 | indoleamine 2,3-dioxygenase 1 [Source:HGNC |
| 162 | 15.9788    | II | 6.0   | IDO1 | indoleamine 2,3-dioxygenase 1 [Source:HGNC |
| 163 | 2.0950067  | I  | 3.0   | IDO1 | indoleamine 2,3-dioxygenase 1 [Source:HGNC |
| 279 | 3.5191457  | I  | 48.0  | IDO1 | indoleamine 2,3-dioxygenase 1 [Source:HGNC |
| 280 | 2.159824   | I  | 48.0  | IDO1 | indoleamine 2,3-dioxygenase 1 [Source:HGNC |
| 281 | 5.2967463  | I  | 48.0  | IDO1 | indoleamine 2,3-dioxygenase 1 [Source:HGNC |
| 284 | 6.3615193  | II | 6.0   | IDO1 | indoleamine 2,3-dioxygenase 1 [Source:HGNC |
| 374 | 2.333051   | I  | 6.0   | IDO1 | indoleamine 2,3-dioxygenase 1 [Source:HGNC |
| 375 | 3.3527706  | I  | 6.0   | IDO1 | indoleamine 2,3-dioxygenase 1 [Source:HGNC |
| 86  | 38.931118  | II | 3.0   | IDO1 | indoleamine 2,3-dioxygenase 1 [Source:HGNC |
| 87  | 239.17076  | II | 12.0  | IDO1 | indoleamine 2,3-dioxygenase 1 [Source:HGNC |
| 88  | 126.639984 | II | 24.0  | IDO1 | indoleamine 2,3-dioxygenase 1 [Source:HGNC |
| 89  | 37.761307  | II | 48.0  | IDO1 | indoleamine 2,3-dioxygenase 1 [Source:HGNC |
| 90  | 15.902369  | II | 72.0  | IDO1 | indoleamine 2,3-dioxygenase 1 [Source:HGNC |
| 143 | 17.301817  | I  | 6.0   | IDO1 | indoleamine 2,3-dioxygenase 1 [Source:HGNC |
| 201 | 6.0346255  | I  | 2.0   | IDO1 | indoleamine 2,3-dioxygenase 1 [Source:HGNC |
| 202 | 8.948965   | I  | 6.0   | IDO1 | indoleamine 2,3-dioxygenase 1 [Source:HGNC |
| 203 | 6.0060296  | I  | 18.0  | IDO1 | indoleamine 2,3-dioxygenase 1 [Source:HGNC |
| 302 | 468.3281   | II | 24.0  | IDO1 | indoleamine 2,3-dioxygenase 1 [Source:HGNC |
| 307 | 33.048046  | II | 48.0  | IDO1 | indoleamine 2,3-dioxygenase 1 [Source:HGNC |
| 308 | 258.19516  | II | 48.0  | IDO1 | indoleamine 2,3-dioxygenase 1 [Source:HGNC |
| 69  | 14.306802  | II | 18.0  | Ido1 | indoleamine 2,3-dioxygenase 1 [Source:MGI  |
| 72  | 15.228998  | I  | 3.0   | Ido1 | indoleamine 2,3-dioxygenase 1 [Source:MGI  |
| 176 | 5.5565176  | II | 6.0   | Ido1 | indoleamine 2,3-dioxygenase 1 [Source:MGI  |
| 343 | 2.006069   | II | 6.0   | Ido1 | indoleamine 2,3-dioxygenase 1 [Source:MGI  |
| 151 | 2.5813553  | II | 6.0   | Ido1 | indoleamine 2,3-dioxygenase 1 [Source:MGI  |
| 152 | 3.9961975  | II | 6.0   | Ido1 | indoleamine 2,3-dioxygenase 1 [Source:MGI  |
| 189 | 9.435782   | I  | 8.0   | Ido1 | indoleamine 2,3-dioxygenase 1 [Source:MGI  |
| 191 | 6.2460413  | I  | 4.0   | Ido1 | indoleamine 2,3-dioxygenase 1 [Source:MGI  |
| 283 | 2.9095078  | I  | 10.0  | Ido1 | indoleamine 2,3-dioxygenase 1 [Source:MGI  |

Suppl. Figure 1. Regulation of SAT1 by inflammatory stimuli and viruses

### Spermidine acetyl transferase 1 (SAT1)

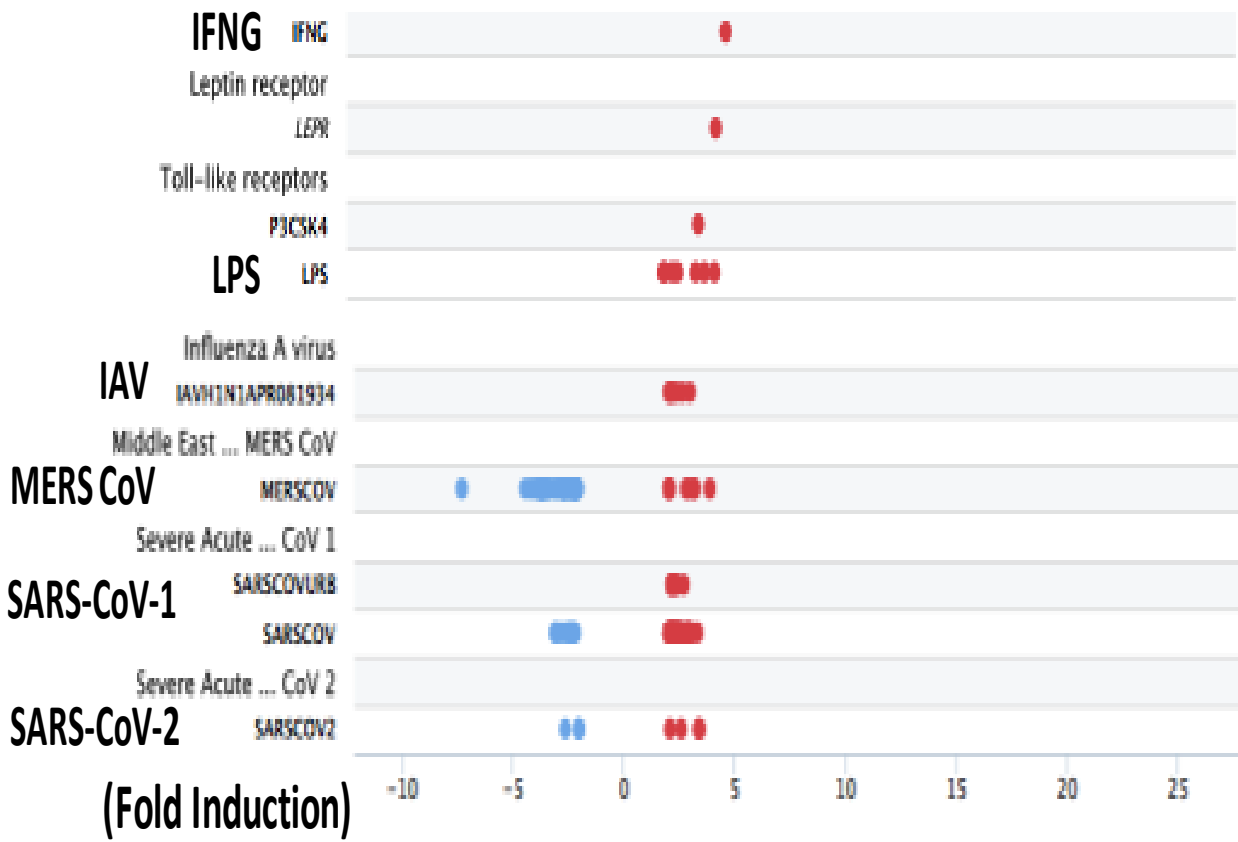

**Suppl. Figure 2. Regulation of CH25H by inflammatory stimuli and viruses**

### Cholesterol 25 hydroxylase (CH25H)

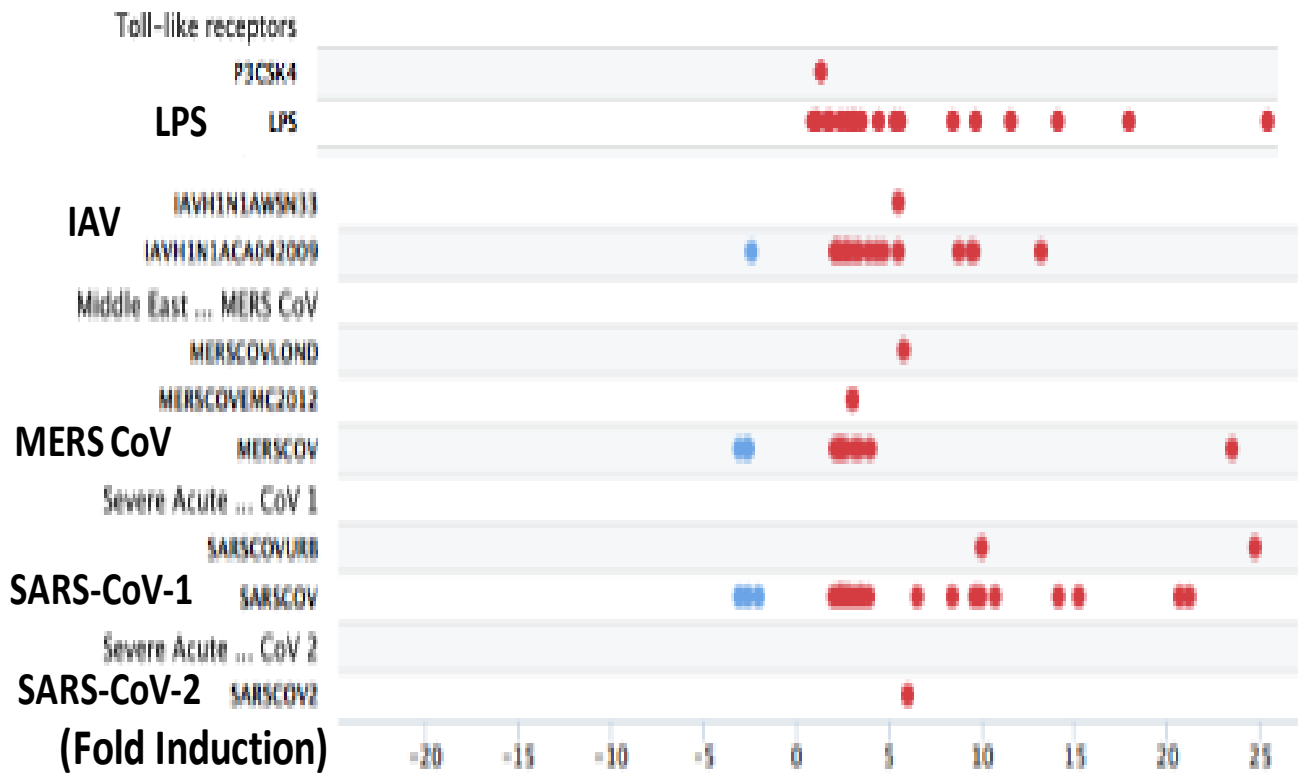

Supplement: Supplementary file 1 [file 80f10da8cfbbc7a0b176f6ee.pdf]
